# Supplementary material for: Different revegetation types alter soil physical-chemical characteristics and fungal community in the Baishilazi Nature Reserve
Source: PeerJ. 2019 Jan 11;6:e6251. doi: 10.7717/peerj.6251 (PMC6330947; doi:10.7717/peerj.6251)
Supplement: Supplemental Information 2 — JM: Juglans mandshurica; QM: Quercus mongolica; CB: Conifer-broadleaf forest; LG: Larix gmelinii; PK: Pinus koraiensis. File 2 applied for data analyses and preparation for Figure 4, Figure 9, and Table 5. [file peerj-07-6251-s002.xls]

## Sheet: Sheet1
Taxon	CB1	CB2	CB3	LG2	LG3	LG4	PK2	PK3	PK4	QM2	QM3	QM4	JM2	JM3	JM4
Basidiomycota	62.1396	62.3116	73.7797	66.5236	60.1815	63.8185	56.9339	32.584	50.1231	72.455	37.5381	62.9166	13.4405	32.9899	17.505
Ascomycota	29.2577	25.379	19.81	17.5221	33.7872	24.1734	17.8319	34.8829	32.5482	19.927	56.3411	30.5455	55.8996	44.0826	55.656
Zygomycota	4.07989	4.97219	2.78985	3.96414	0.814353	1.85067	3.75631	9.5436	5.79747	2.25653	1.85232	2.80195	11.4726	3.64245	8.60818
Rozellomycota	0.417359	0.496794	0.340745	2.04793	1.43784	1.30311	1.31852	1.55667	1.03132	0.835596	1.0724	0.352367	1.27237	3.62549	1.36678
others	4.10545	6.84047	3.27967	9.94222	3.77911	8.85437	20.1594	21.4328	10.5	4.52579	3.196	3.38357	17.915	15.6596	16.864
