# Supplementary material for: Different revegetation types alter soil physical-chemical characteristics and fungal community in the Baishilazi Nature Reserve
Source: PeerJ. 2019 Jan 11;6:e6251. doi: 10.7717/peerj.6251 (PMC6330947; doi:10.7717/peerj.6251)
Supplement: Supplemental Information 4 — JM: Juglans mandshurica; QM: Quercus mongolica; CB: Conifer-broadleaf forest; LG: Larix gmelinii; PK: Pinus koraiensis. File 4 applied for data analyses and preparation for Figure 2, Figure 9, Table 2, Table 4 and Table 5. [file peerj-07-6251-s004.xls]

## Sheet: Sheet1
Types	pH
JM	5.68	5.75	5.68
QM	4.79	4.98	4.91
CB	4.99	4.95	5.04
LG	5.41	5.44	5.35
PK	5.45	5.49	5.49
Types	Total C(g/kg)
JM	108.57	94.07	98.95
QM	86.26	86.81	80.8
CB	71.75	80.13	74.58
LG	41.64	43.67	46.06
PK	41.25	42.35	41.5
Types	Total N(mg/kg)
JM	8440	7340	7620
QM	7717.5	8368.5	6040
CB	5180	5830	5390
LG	3675	3874.5	4011
PK	3622.5	3549	3570
Types	C/N
JM	12.8637	12.8161	12.9856
QM	11.1772	10.3734	13.3775
CB	13.8514	13.7444	13.8367
LG	11.3306	11.2711	11.4834
PK	11.3872	11.9329	11.6246
Types	Available N(mg/kg)
JM	66.8115	54.439	50.197
QM	42.42	53.3785	45.955
CB	43.834	39.592	47.369
LG	29.694	35.7035	34.643
PK	26.866	28.28	28.987
Types	Total P(g/kg)
JM	0.980286	0.827816	0.973053
QM	0.734152	0.733326	0.742252
CB	1.28171	1.69014	1.4152
LG	0.510565	0.677066	0.683333
PK	0.782128	0.726598	0.794359
Types	Available P(mg/kg)
JM	3.2975	2.195	7.775
QM	1.845	3.455	1.845
CB	3.1825	1.4325	2.985
LG	0.505	1.5125	1.61
PK	2.01562	9.1475	5.7725
